# Supplementary material for: A missense mutation in the Kv1.1 voltage-gated potassium channel–encoding gene KCNA1 is linked to human autosomal dominant hypomagnesemia
Source: JCI journal article supplement (doi:10.1172/jci36948), 2009-03-19
Supplement: sd1 [file 1]

# Supplemental Figure 1

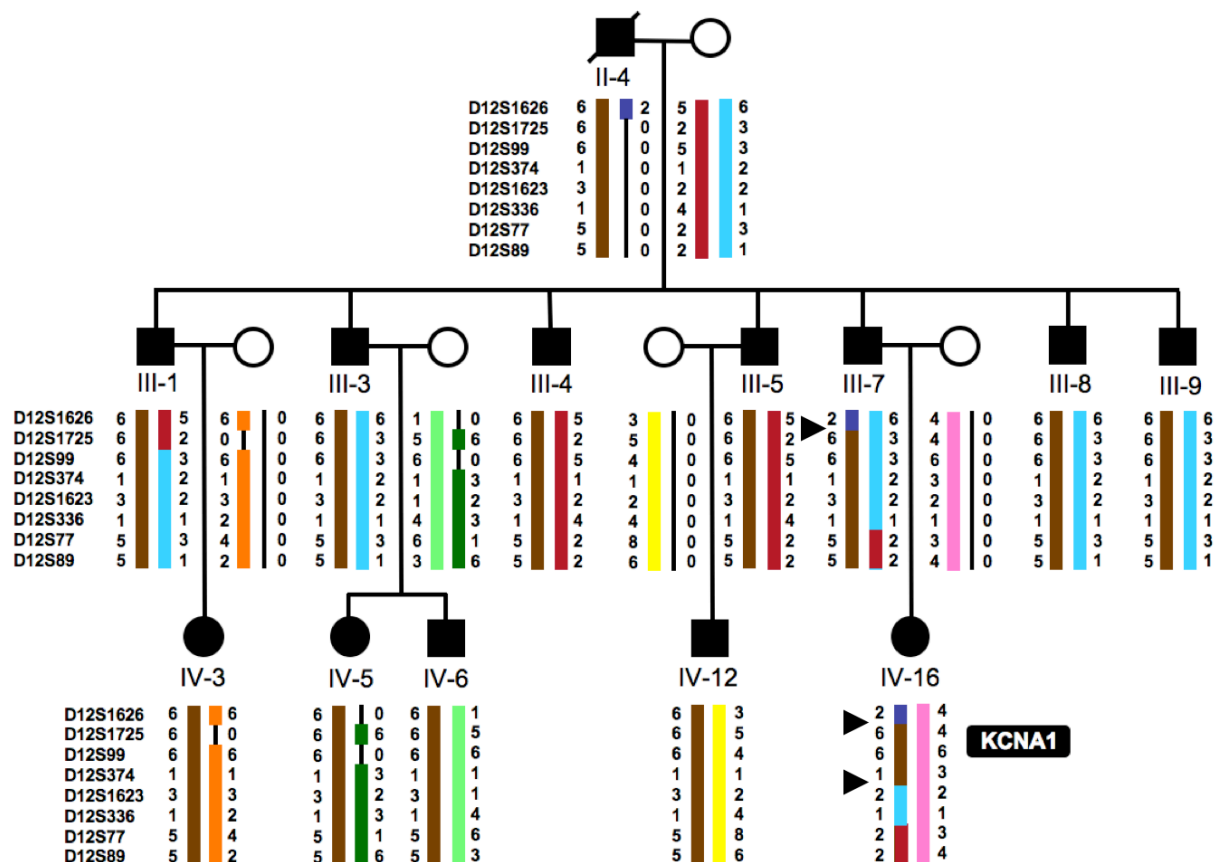

**Supplemental Figure 1** Haplotype analysis of the autosomal dominant hypomagnesemia locus on the short arm of chromosome 12 in the Brazilian family. Affected family members are shown in black; circles and squares refer to female and male individuals, respectively. A diagonal line indicates that the individual is deceased. Microsatellite markers are depicted on the left. The haplotypes are illustrated by different colors. The brown haplotype co-segregates with the disease. Critical recombinations are pinpointed by arrow heads (v) in individuals III-7 (telomeric) and IV-16 (centromeric). *KCNA1* is located within the critical region between markers D12S1725 and D12S99 (black bar).

## Supplemental Table 1 Overview of primers sets

| Accession: BC101733    | Forward primer (5' to 3') | Reverse primer (5' to 3') |
|------------------------|---------------------------|---------------------------|
| Human <i>KCNA1</i> 1.1 | GAGGGGGATTCCAAACTGAG      | AACTTCTCCATGGCCTCCTC      |
| Human <i>KCNA1</i> 1.2 | GTACTTCTTCGACCGCAACC      | CCCAGCGTGATGAAATAAGG      |
| Human <i>KCNA1</i> 1.3 | CCCTTCTTCATCGTGGAAC       | AGCAACTGAGCCTGCTCTTC      |
| Human <i>KCNA1</i> 1.4 | GACAATTGGAGGCAAGATCG      | CCCAAATCCTCAATGCAAC       |

These primer sets, overlapping the human *KCNA1* coding region, were used for mutation analysis based on GenBank accession code BC101733.
